# Supplementary material
Source: publisher figshare collection journal article supplement (https://tandf.figshare.com/ndownloader/files/12847286)
Supplement: Supplementary file 1 [file 12847286]

**Supplemental Information**

**An inter-comparison of black carbon related instruments in a laboratory study of biomass burning aerosol**

1. Tasoglou1,5, R. Subramanian2, S. N. Pandis1,3,4

1Department of Chemical Engineering, Carnegie Mellon University, Pittsburgh, USA

2Department of Mechanical Engineering, Carnegie Mellon University, Pittsburgh, USA

3Department of Chemical Engineering, University of Patras, Patras, Greece

4Institute of Chemical Engineering Sciences (ICE-HT), FORTH, Patras, Greece

5RJ Lee Group, Inc, Monroeville, USA

**Table S1:** Initial mode diameters of the biomass burning particles

| **Exp.** | **Dm,number** a  (nm) | **Dme,rBC**b  (nm) | **Dva,OA**c  (nm) | **Dva,rBC**d  (nm) |
| --- | --- | --- | --- | --- |
| 1 | 245 | - | 192 | 205 |
| 2 | 295 | - | 157 | 192 |
| 3 | 181 | - | 157 | 157 |
| 4 | 178 | 235 | 123 | 149 |
| 5 | 40 | 175 | 100 | 115 |
| 6 | 163 | 245 | 149 | 140 |
| 7 | 129 | 180 | 108 | 123 |
| 8 | 60 | 200 | 132 | 149 |
| 9 | 187 | - | 299 | 299 |
| 10 | 211 | - | 154 | 136 |
| 11 | 204 | - | 78 | 78 |
| 12 | 220 | - | 118 | 118 |
| 13 | 202 | - | 68 | 68 |
| 14 | 36 | - | 119 | 119 |
| 15 | 180 | - | 83 | 68 |

a Number mode diameter (SMPS)

b BC mass equivalent mode diameter (SP2)

c OA vacuum aerodynamic mode diameter (SP-AMS)

d Refractory BC vacuum aerodynamic diameter (SP-AMS)

**Table S2: Comparison of eBC measurements**

| **Instrument** | | **Low OA/rBC** | | | **High OA/rBC** | | |
| --- | --- | --- | --- | --- | --- | --- | --- |
| **y** | **x** | **Slope** | **Intercept** | **R2** | **Slope** | **Intercept** | **R2** |
| PAXblue | Aethalometer | 0.84 | 0.29 | 0.99 | 1.01 | -2.78 | 0.82 |
| PAXgreen | Aethalometer | 0.89 | 0.19 | 1 | 0.86 | 2.98 | 0.87 |
| MAAP | Aethalometer | 0.94 | -0.61 | 0.98 | 0.53 | 11.01 | 0.88 |
| PAXblue | PAXgreen | 0.94 | 0.12 | 1 | 1.19 | -6.84 | 0.97 |
| PAXblue | MAAP | 0.88 | 0.97 | 0.98 | 1.88 | -15.39 | 0.88 |
| PAXgreen | MAAP | 0.94 | 0.9 | 0.99 | 1.64 | -10.97 | 0.94 |


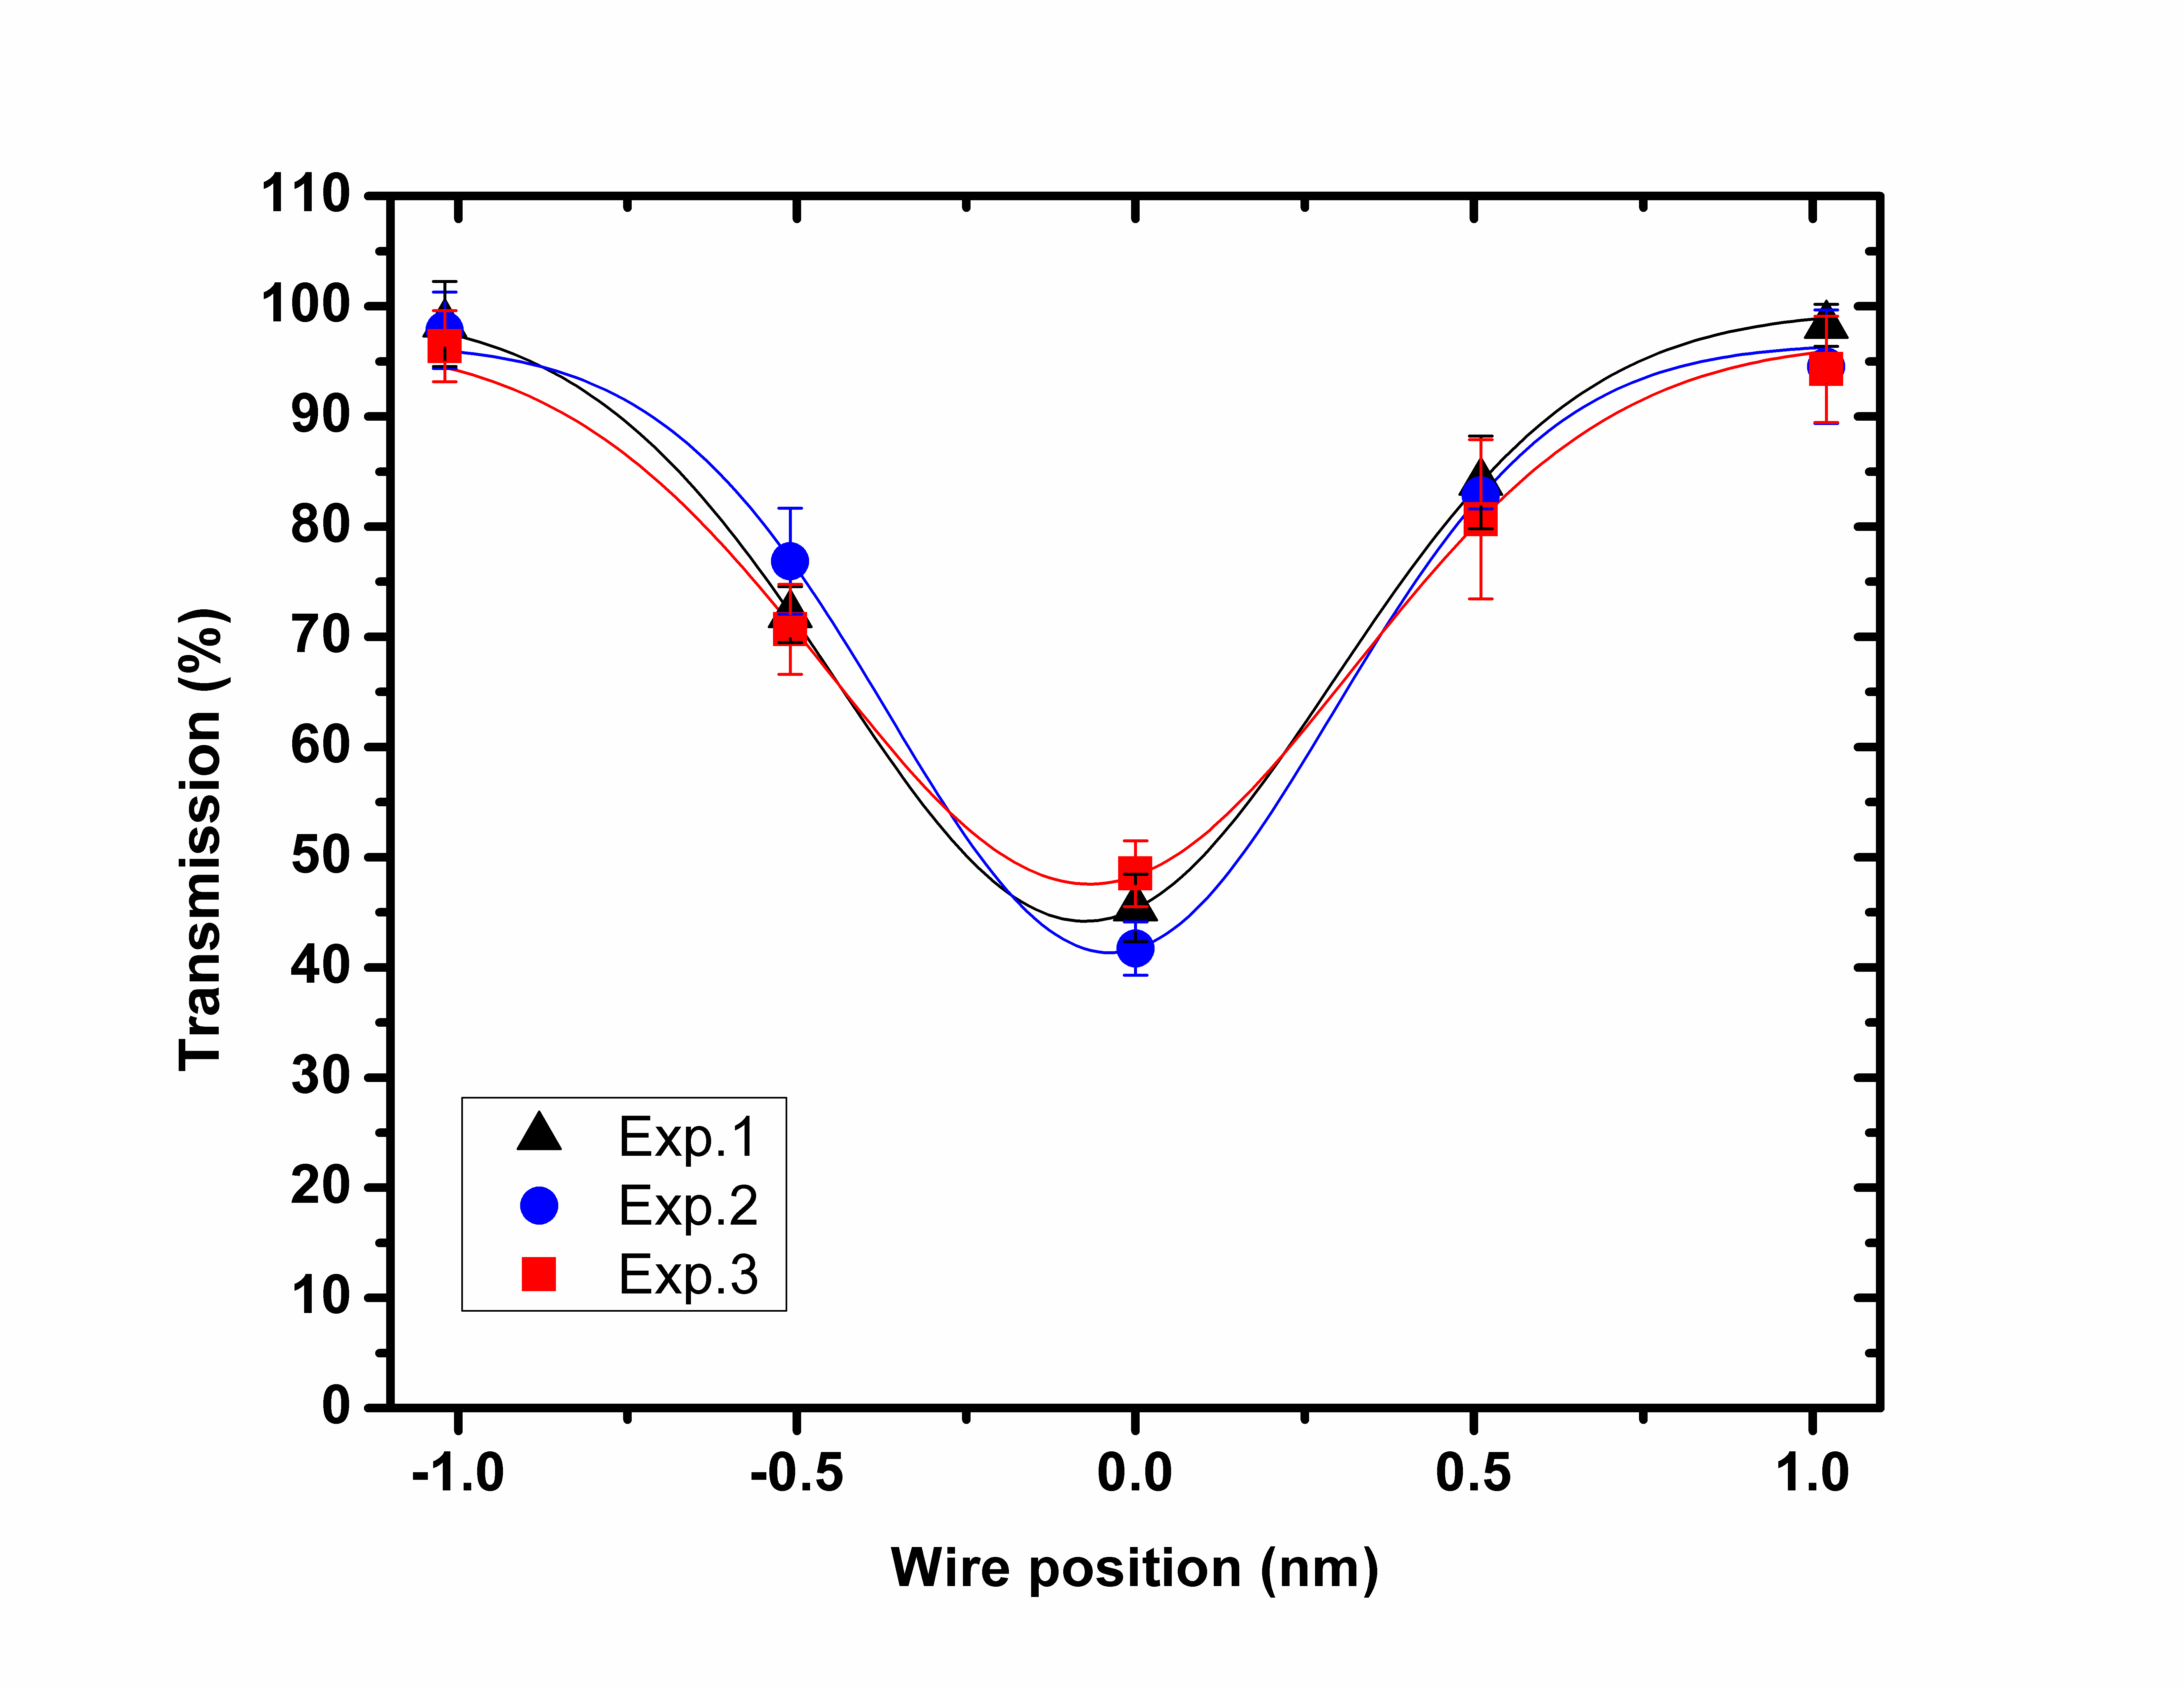


**Figure S1:** SP-AMS rBC signal transmission as a function of the wire position during the beam-width probe measurements for Experiment 1 to 3. The symbols represent the average signal transmission, for 5 different position of the wire compared to the center of the vaporizer, for 1.5 hours of sampling. The lines represent the fitting of the measurements using a 1-D Gaussian distribution.


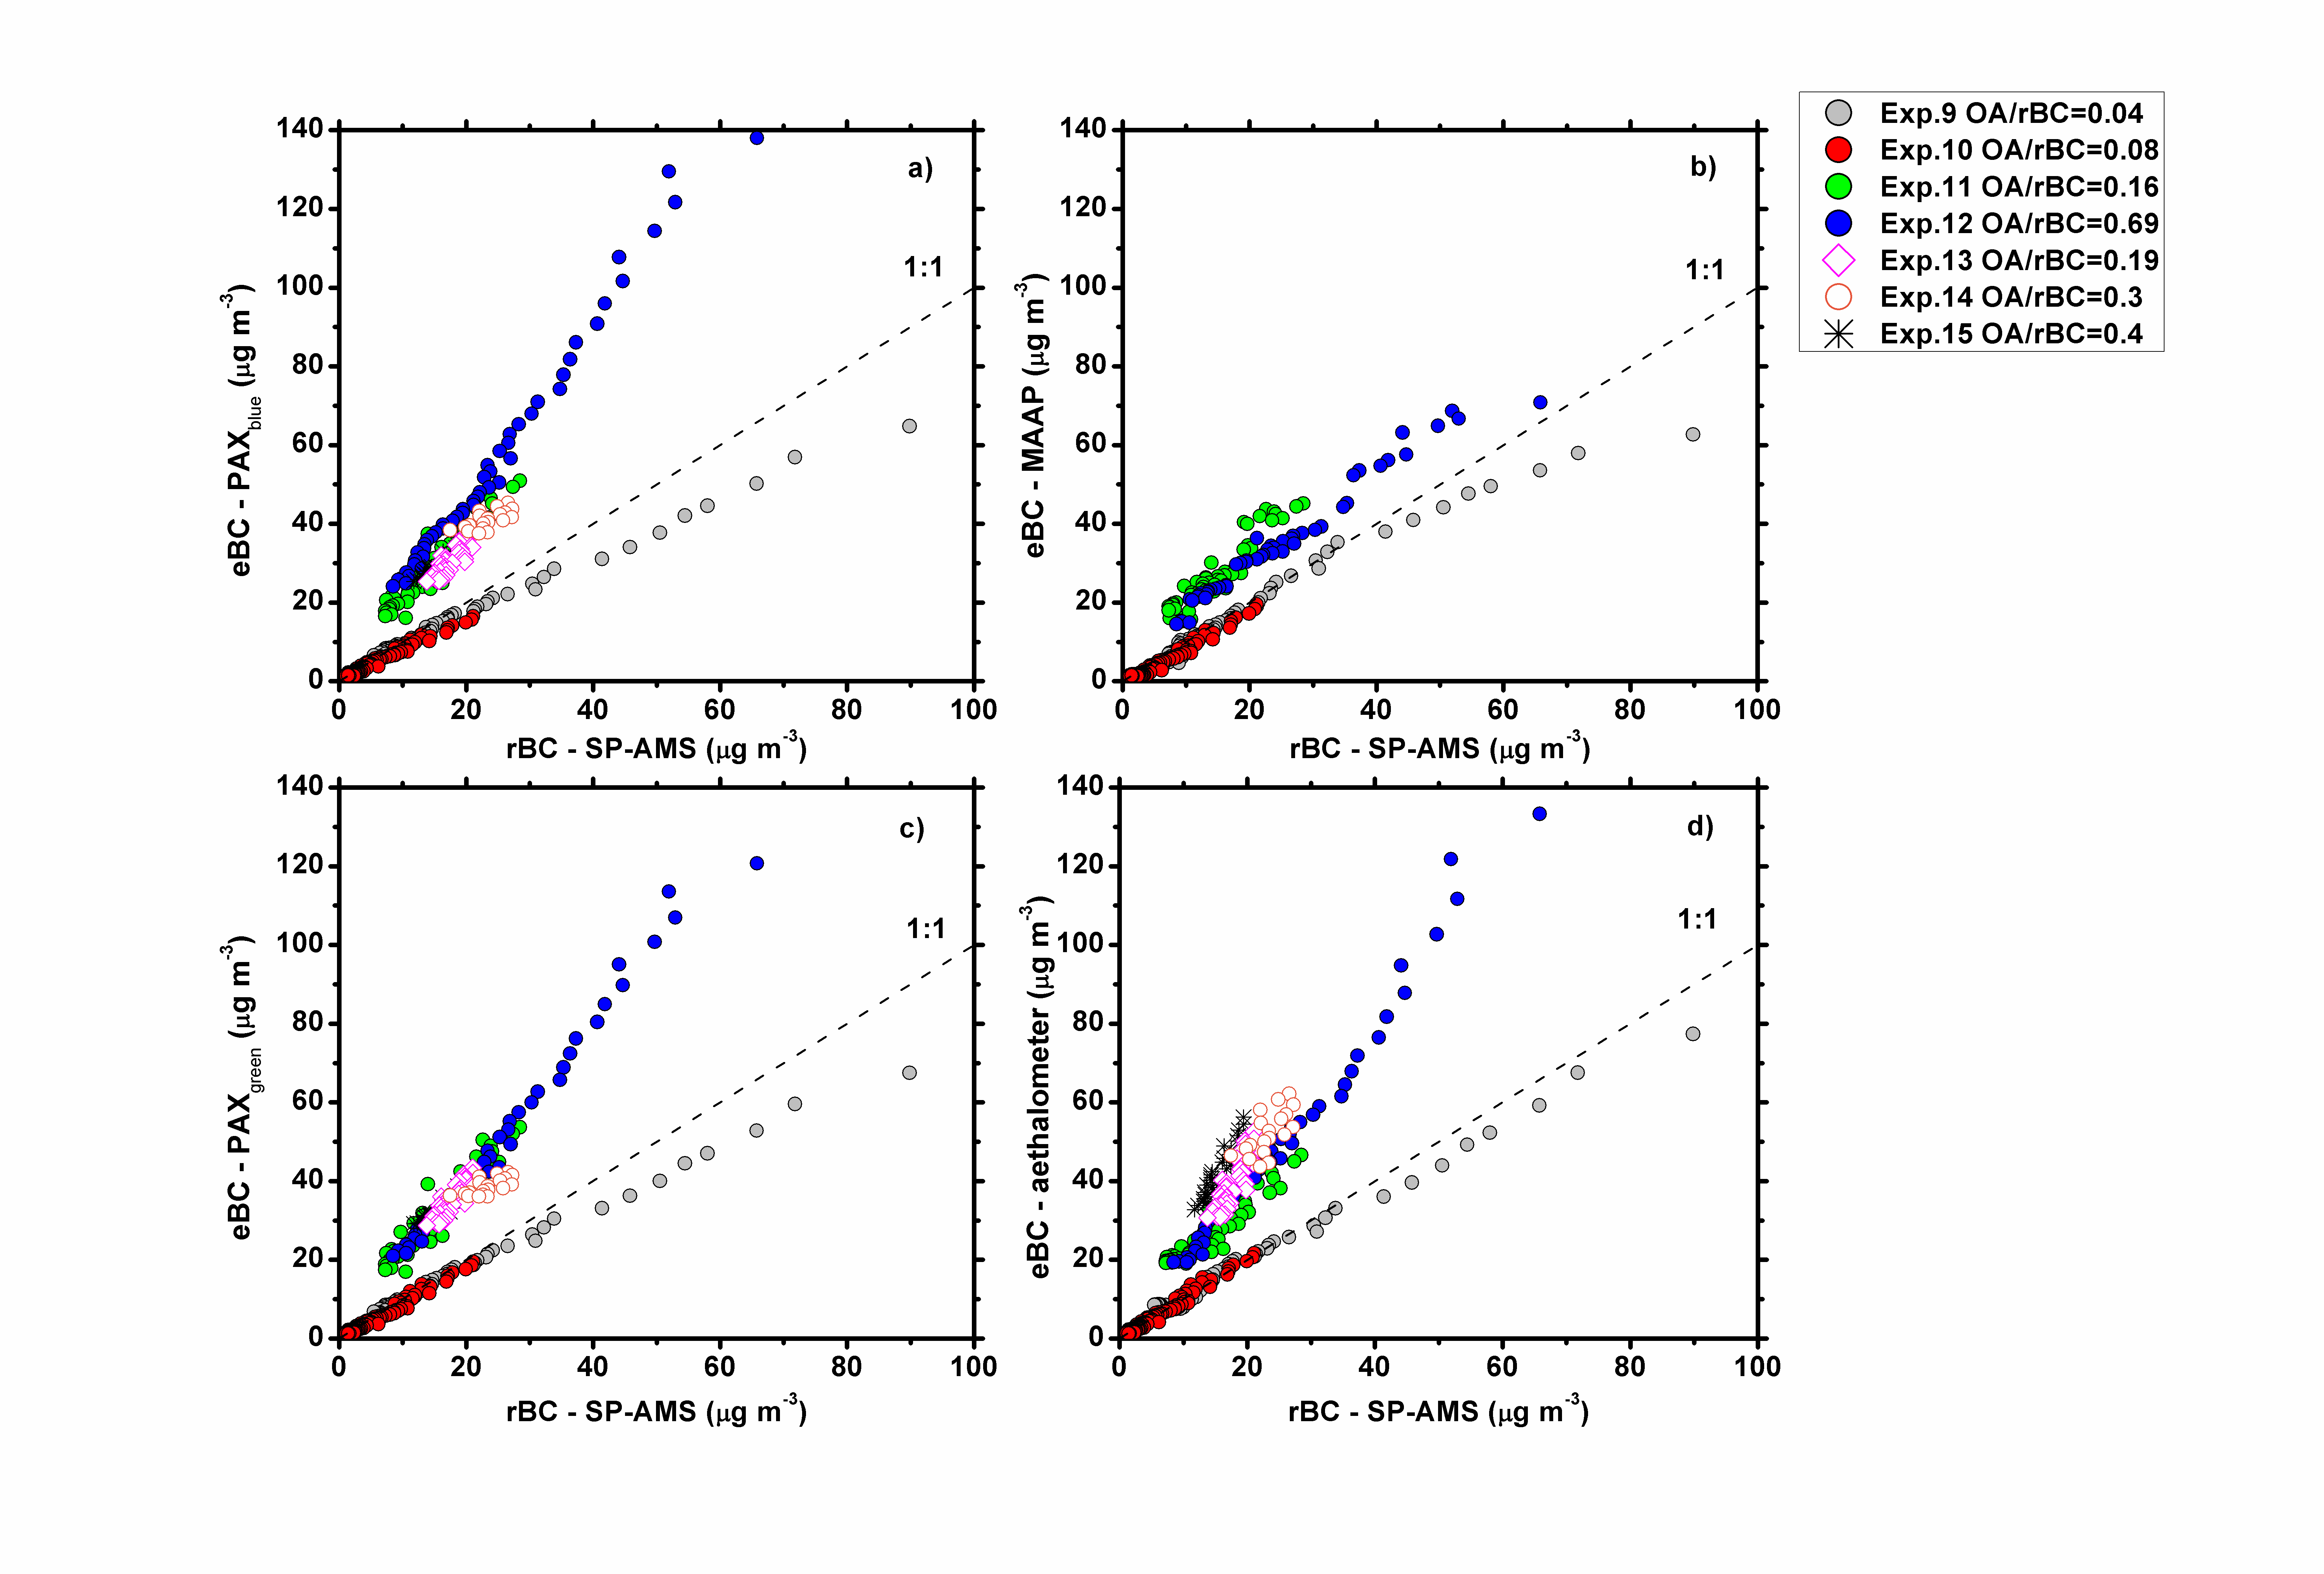


**Figure S2:** Inter-comparison of the rBC measured by the SP-AMS (corrected for CE=0.35) and the measured eBC from all the optical BC related instruments. The 1:1 line is also shown.
